# Supplementary material for: Low-temperature synthesis of porous organic polymers with donor–acceptor structure and β-ketoenamine for photocatalytic oxidative coupling of amines
Source: Royal Society of Chemistry journal article supplement (doi:10.1039/d4nr00391h), 2024-01-01
Supplement: d4nr00391h1.pdf [file d4nr00391h1.pdf]

## Supporting Information

### Low-temperature synthesis of porous organic polymers with donor-acceptor structure and $\beta$ -ketoenamine for photocatalytic oxidative coupling of amines

Rusong Sang<sup>a,b</sup>, Yezi Hu<sup>a</sup>, Zewen Shen<sup>a</sup>, Guixia Zhao<sup>a\*</sup>, Junrong Yue<sup>b\*</sup>, Xiubing Huang<sup>c\*</sup>

<sup>a</sup> MOE Key Laboratory of Resources and Environmental System Optimization, College of Environmental Science and Engineering, North China Electric Power University, Beijing 102206, PR China

<sup>b</sup> State Key Laboratory of Multi Phase Complex System, Institute of Process Engineering, Chinese Academy of Sciences, Beijing 100190, PR China

<sup>c</sup> Beijing Advanced Innovation Center for Materials Genome Engineering, Beijing Key Laboratory of Function Materials for Molecule & Structure Construction, School of Materials Science and Engineering, University of Science and Technology Beijing, Beijing 100083, PR China

Corresponding authors: guixiazhao@ncepu.edu.cn (G. Zhao), jryue@ipe.ac.cn (J. Yue), xiubinghuang@ustb.edu.cn (X. Huang)

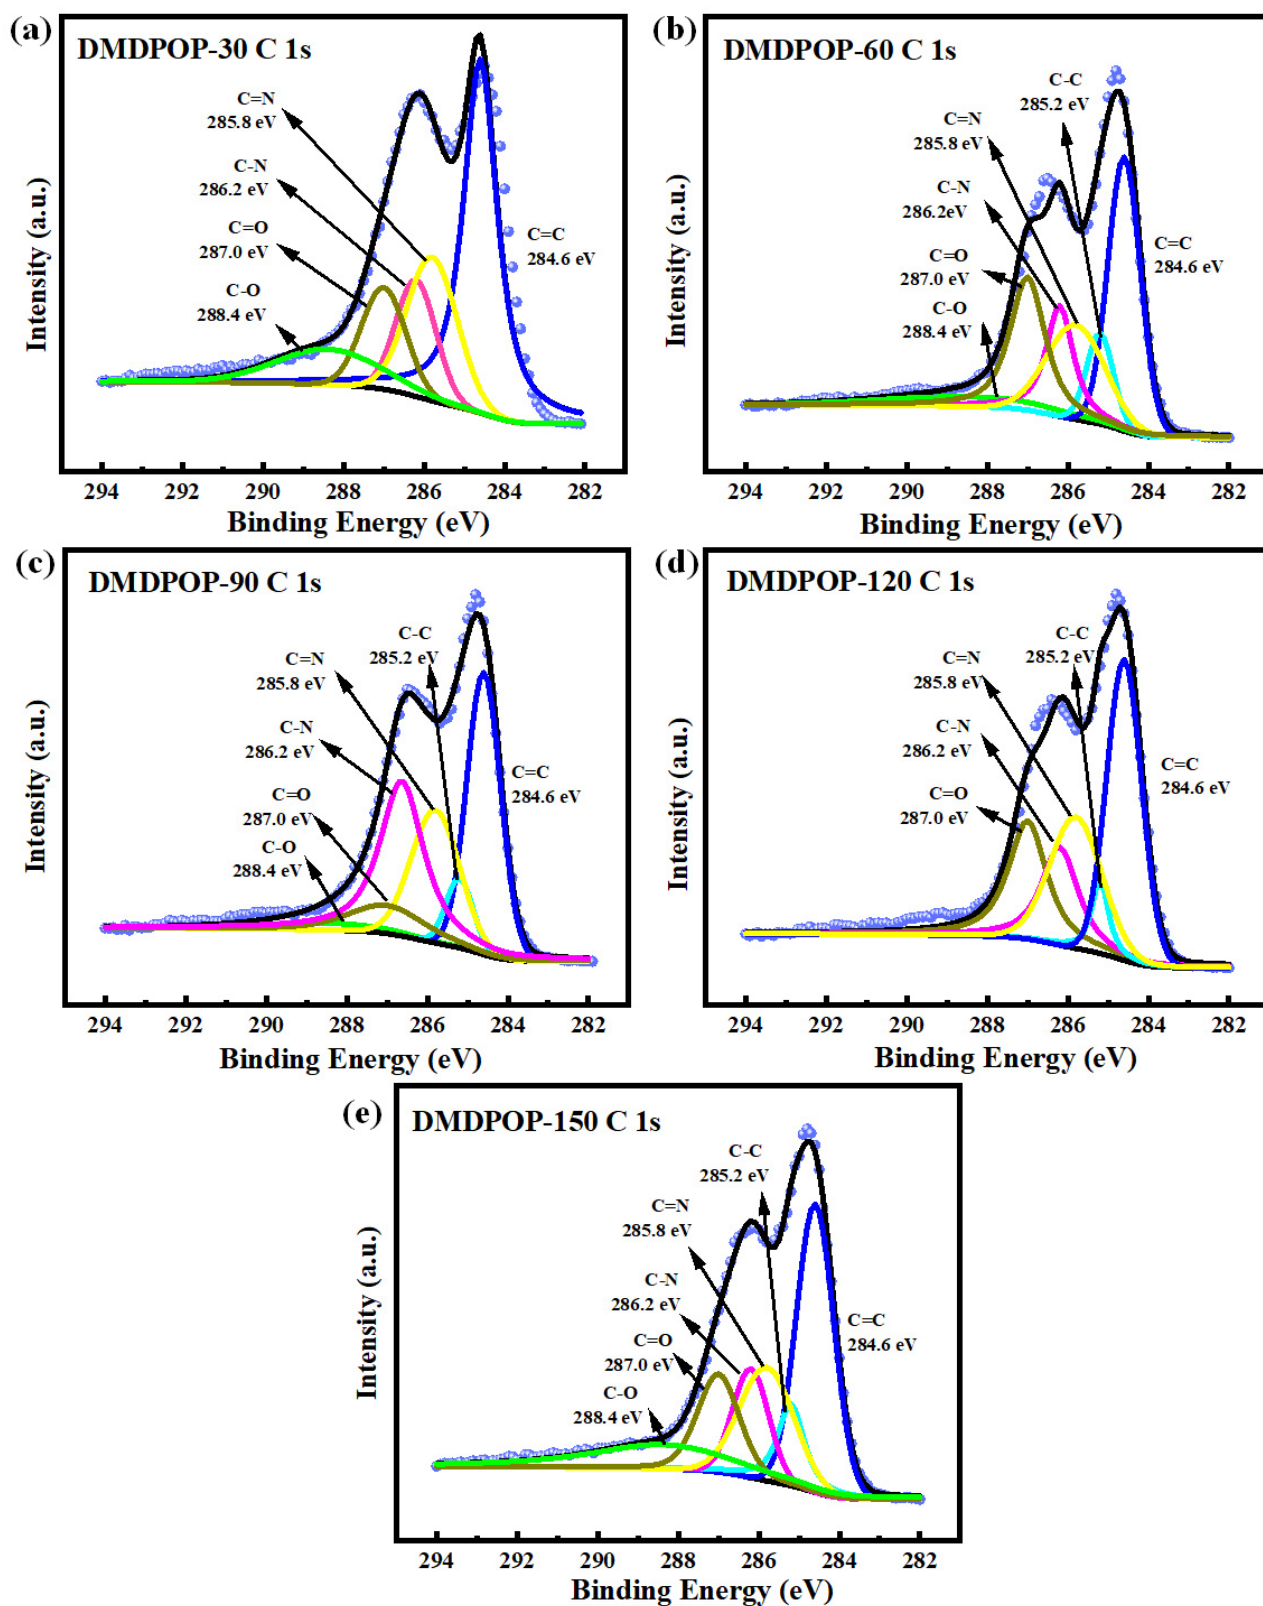

Figure S1. C 1s XPS spectra of DMDPOP-X samples.

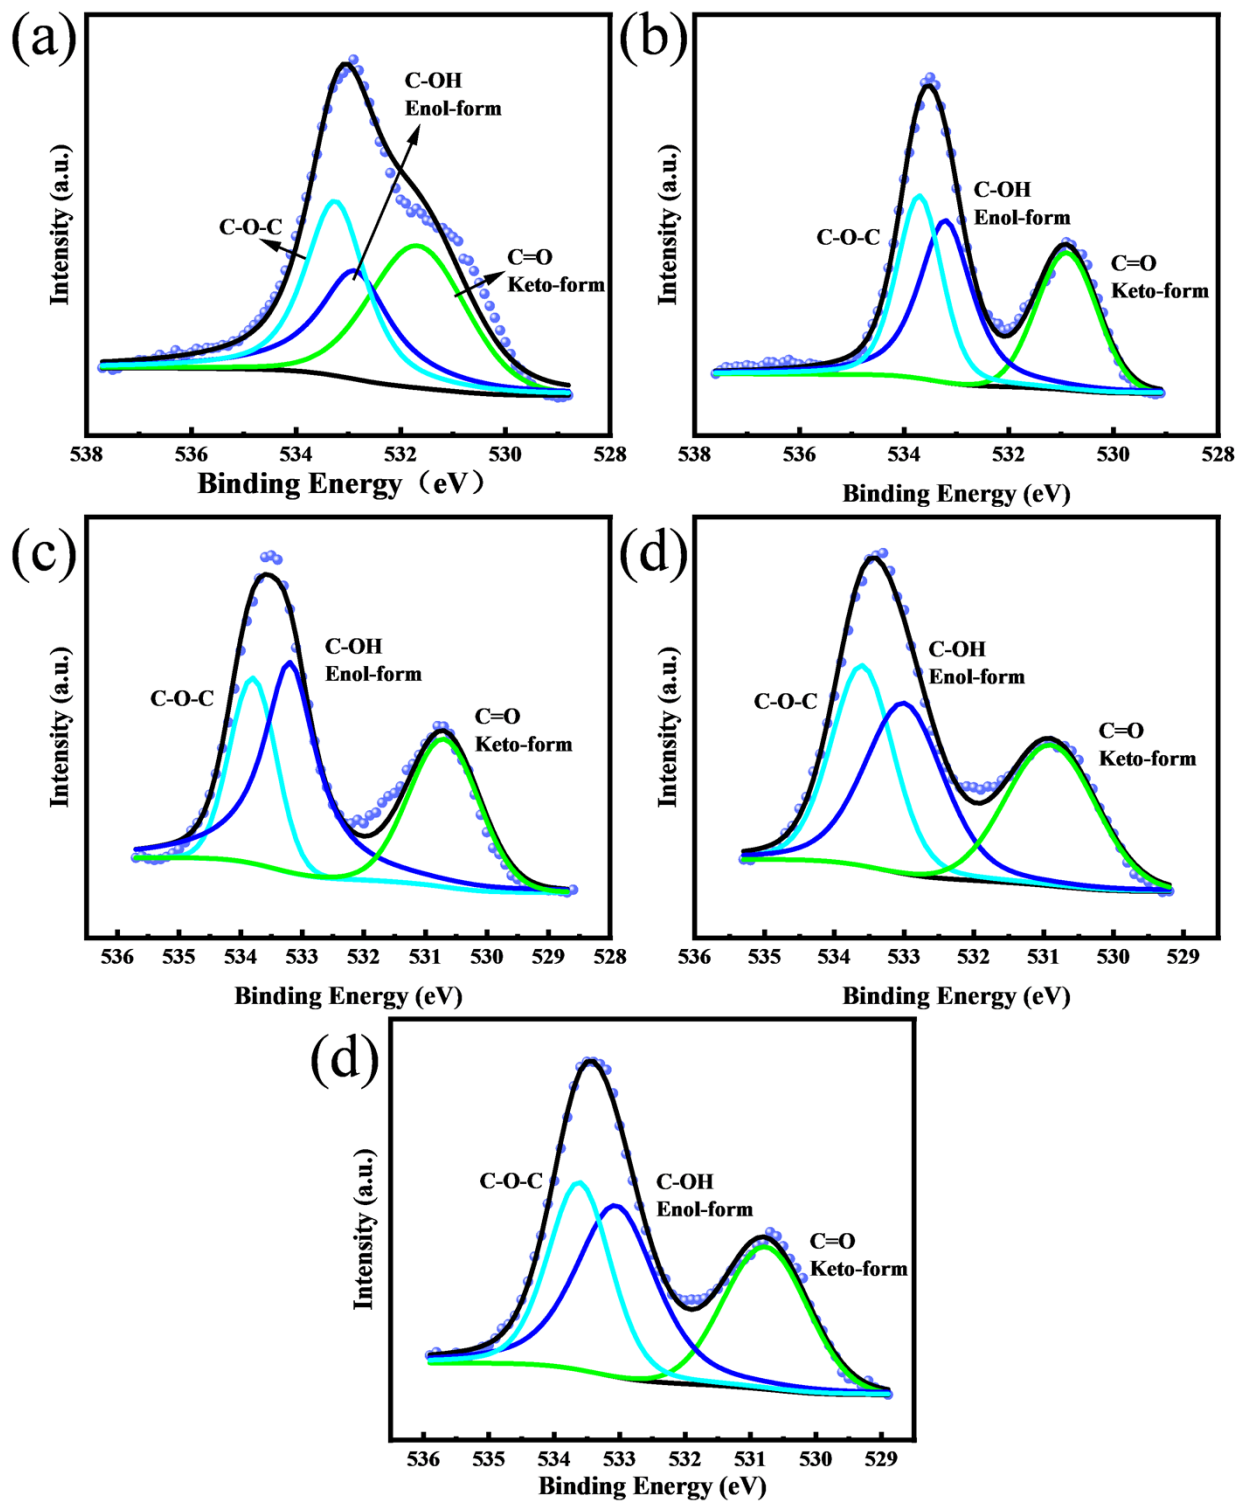

Figure S2. O 1s XPS spectra of DMDPOP-X samples.

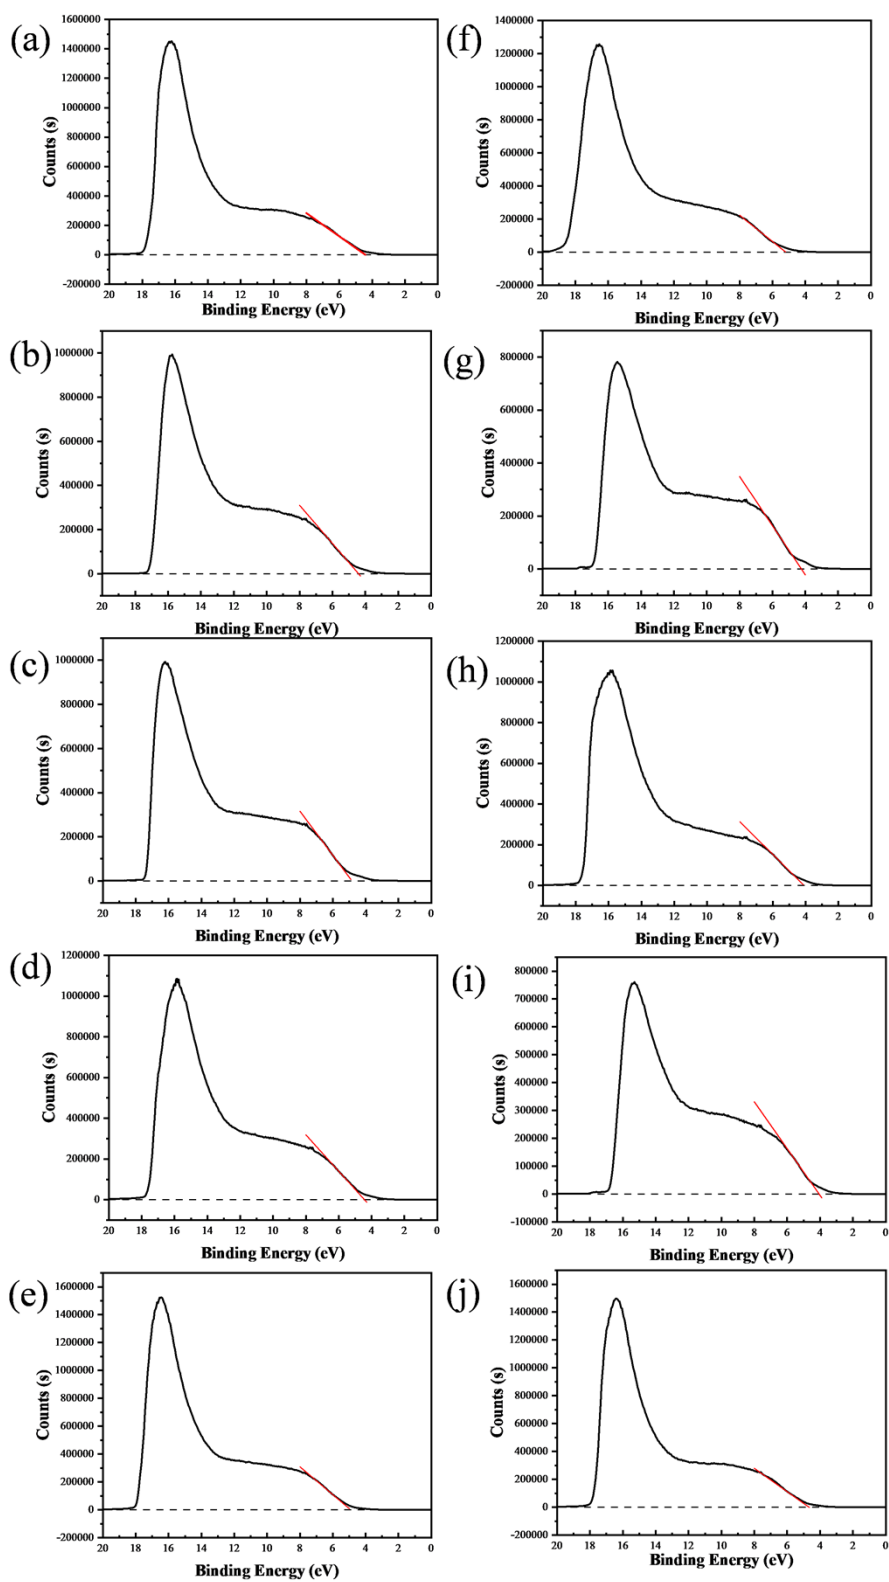

**Figure S3.** UPS plots of DMDPOP-30 (a), DMDPOP-60 (b), DMDPOP-90 (c), DMDPOP-120 (d), DMDPOP-150 (e), DHDPOP-30 (f), DHDPOP-60 (g), DHDPOP-90 (h), DHDPOP-120 (i) and DHDPOP-150 (j)

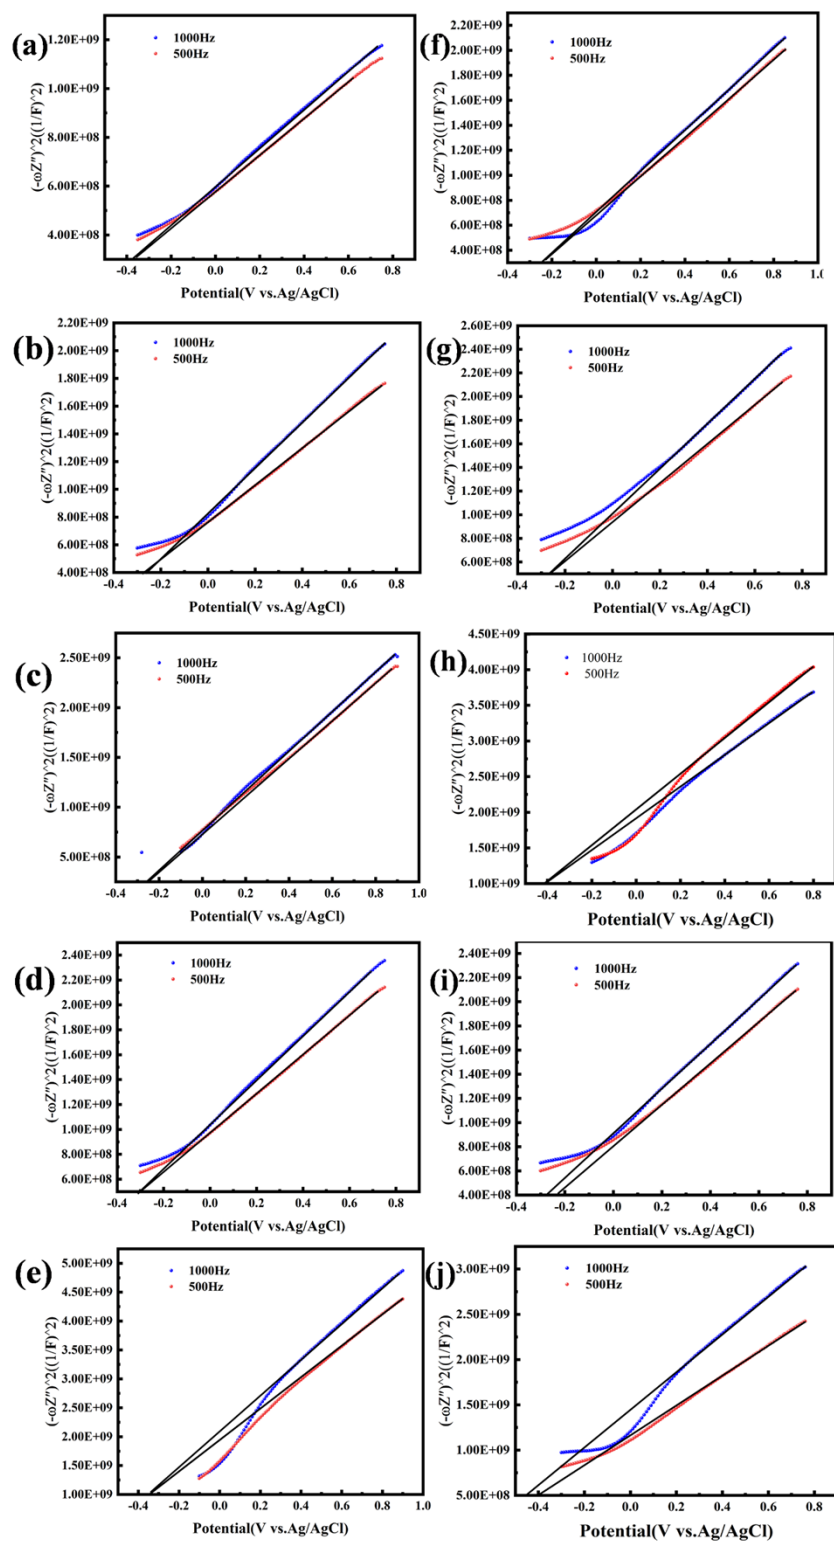

**Figure S4.** Mott–Schottky plots of DMDPOP-30 (a), DMDPOP-60 (b), DMDPOP-90 (c), DMDPOP-120 (d), DMDPOP-150 (e), DHDPOP-30 (f), DHDPOP-60 (g), DHDPOP-90 (h), DHDPOP-120 (i) and DHDPOP-150 (j) at 1000 Hz and 500 Hz.

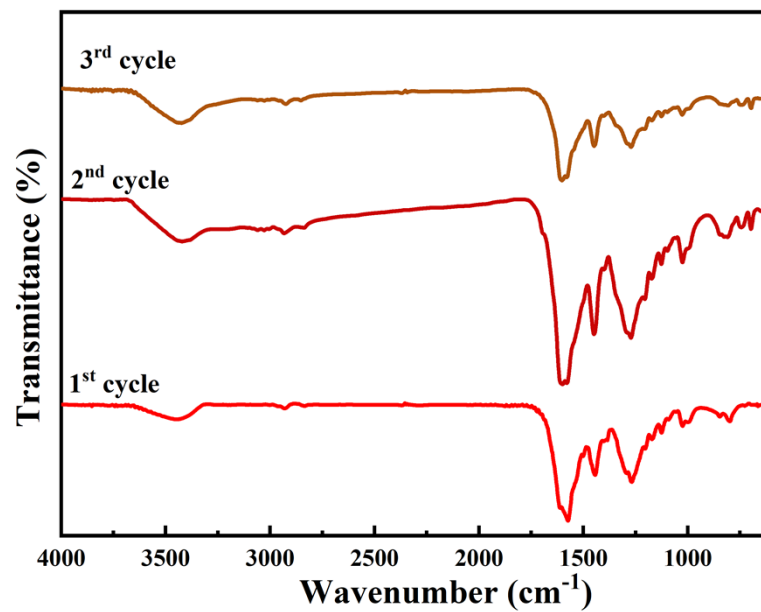

**Figure S5.** FT-IR spectra of DMDPOP-30 after recycle experiment.

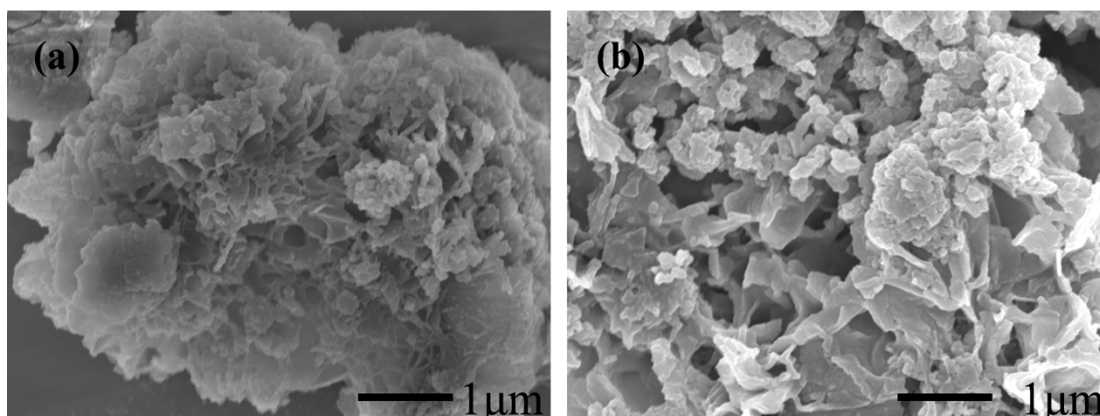

**Figure S6.** SEM spectra of DMDPOP-30 after 2<sup>nd</sup> recycle (a) and 3<sup>rd</sup> recycle experiment (b).

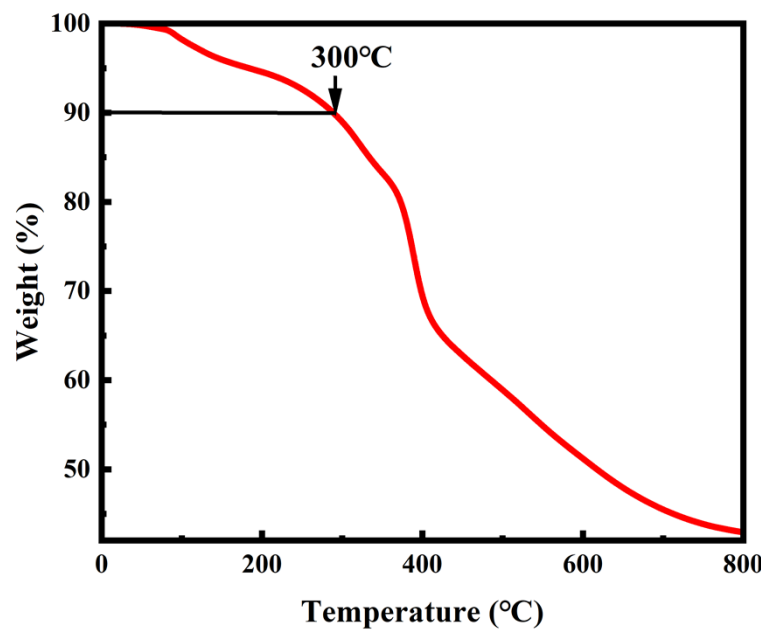

**Figure S7.** TGA curve of DMDPOP-30 under N<sub>2</sub>.

**Table S1.** The crystal plane of Materials Studio crystal and its corresponding 2theta value were simulated.

**Crystal model :**

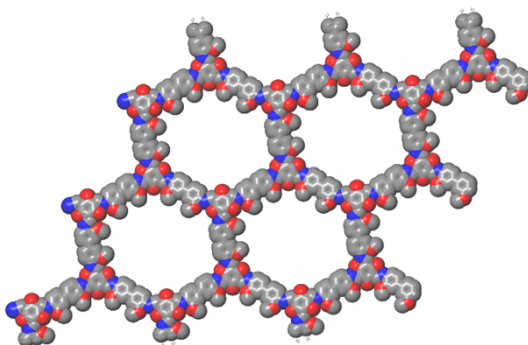

**XRD Comparison Between Simulation Model and Experimental Data :**

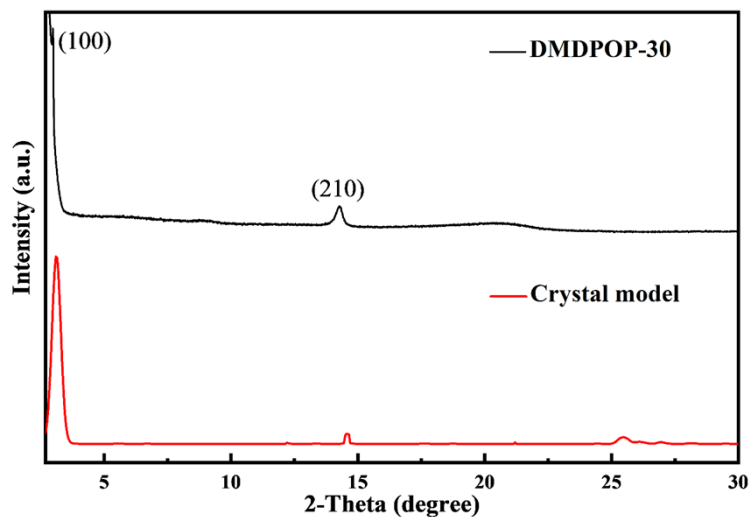

| h | k | l | 2theta   |  | h | k | l | 2theta   |  | h | k | l | 2theta   |
|---|---|---|----------|--|---|---|---|----------|--|---|---|---|----------|
| 0 | 1 | 0 | 3.117749 |  | 4 | 2 | 0 | 17.79191 |  | 0 | 0 | 1 | 25.39547 |
| 1 | 1 | 0 | 3.117749 |  | 6 | # | 0 | 17.79191 |  | 0 | 1 | 1 | 25.56331 |
| 1 | 0 | 0 | 3.11775  |  | 6 | # | 0 | 17.79191 |  | 0 | 1 | 1 | 25.56331 |
| 0 | 1 | 0 | 3.126206 |  | 2 | 1 | 0 | 17.8372  |  | 1 | # | 1 | 25.56331 |
| 1 | 1 | 0 | 3.126207 |  | 4 | # | 0 | 17.8372  |  | 1 | # | 1 | 25.56331 |
| 1 | 0 | 0 | 3.126207 |  | 2 | 4 | 0 | 17.8372  |  | 1 | 0 | 1 | 25.56331 |



|   |   |   |          |  |   |   |   |          |  |   |   |   |          |
|---|---|---|----------|--|---|---|---|----------|--|---|---|---|----------|
| 1 | 2 | 0 | 5.610362 |  | 4 | 2 | 0 | 17.8372  |  | 1 | 0 | 1 | 25.56331 |
| 1 | 1 | 0 | 5.610363 |  | 6 | # | 0 | 17.8372  |  | 1 | # | 0 | 25.61856 |
| 2 | 1 | 0 | 5.610363 |  | 6 | # | 0 | 17.8372  |  | 1 | 7 | 0 | 25.61856 |
| 1 | 2 | 0 | 5.625024 |  | 1 | # | 0 | 18.74413 |  | 7 | # | 0 | 25.61856 |
| 1 | 1 | 0 | 5.625024 |  | 1 | 5 | 0 | 18.74413 |  | 8 | # | 0 | 25.61856 |
| 2 | 1 | 0 | 5.625025 |  | 5 | # | 0 | 18.74413 |  | 7 | 1 | 0 | 25.61856 |
| 0 | 2 | 0 | 6.523363 |  | 6 | # | 0 | 18.74413 |  | 8 | # | 0 | 25.61856 |
| 2 | 2 | 0 | 6.523363 |  | 5 | 1 | 0 | 18.74413 |  | 0 | 1 | 1 | 25.62863 |
| 2 | 0 | 0 | 6.523363 |  | 6 | # | 0 | 18.74413 |  | 0 | 1 | 1 | 25.62863 |
| 0 | 2 | 0 | 6.5403   |  | 1 | # | 0 | 18.79185 |  | 1 | # | 1 | 25.62863 |
| 2 | 2 | 0 | 6.5403   |  | 1 | 5 | 0 | 18.79185 |  | 1 | # | 1 | 25.62863 |
| 2 | 0 | 0 | 6.5403   |  | 5 | # | 0 | 18.79185 |  | 1 | 0 | 1 | 25.62863 |
| 1 | 3 | 0 | 8.725562 |  | 6 | # | 0 | 18.79185 |  | 1 | 0 | 1 | 25.62863 |
| 2 | 3 | 0 | 8.725562 |  | 5 | 1 | 0 | 18.79185 |  | 1 | # | 0 | 25.68403 |
| 1 | 2 | 0 | 8.725562 |  | 6 | # | 0 | 18.79185 |  | 1 | 7 | 0 | 25.68403 |
| 2 | 1 | 0 | 8.725563 |  | 0 | 6 | 0 | 20.2366  |  | 7 | # | 0 | 25.68403 |
| 3 | 2 | 0 | 8.725563 |  | 6 | # | 0 | 20.2366  |  | 8 | # | 0 | 25.68404 |
| 3 | 1 | 0 | 8.725563 |  | 6 | 0 | 0 | 20.2366  |  | 7 | 1 | 0 | 25.68404 |
| 1 | 3 | 0 | 8.747998 |  | 0 | 6 | 0 | 20.28814 |  | 8 | # | 0 | 25.68404 |
| 2 | 3 | 0 | 8.747998 |  | 6 | # | 0 | 20.28814 |  | 1 | # | 1 | 26.02266 |
| 1 | 2 | 0 | 8.747998 |  | 6 | 0 | 0 | 20.28814 |  | 1 | # | 1 | 26.02266 |
| 2 | 1 | 0 | 8.747998 |  | 3 | # | 0 | 20.52276 |  | 1 | 1 | 1 | 26.02266 |
| 3 | 2 | 0 | 8.747999 |  | 4 | # | 0 | 20.52276 |  | 1 | 1 | 1 | 26.02266 |
| 3 | 1 | 0 | 8.747999 |  | 3 | 4 | 0 | 20.52276 |  | 2 | # | 1 | 26.02266 |
| 0 | 3 | 0 | 9.935012 |  | 4 | 3 | 0 | 20.52276 |  | 2 | # | 1 | 26.02266 |
| 3 | 3 | 0 | 9.935013 |  | 7 | # | 0 | 20.52276 |  | 1 | # | 1 | 26.08919 |
| 3 | 0 | 0 | 9.935013 |  | 7 | # | 0 | 20.52276 |  | 1 | # | 1 | 26.08919 |
| 0 | 3 | 0 | 9.960474 |  | 3 | # | 0 | 20.57503 |  | 1 | 1 | 1 | 26.08919 |
| 3 | 3 | 0 | 9.960475 |  | 4 | # | 0 | 20.57503 |  | 1 | 1 | 1 | 26.08919 |
| 3 | 0 | 0 | 9.960475 |  | 3 | 4 | 0 | 20.57504 |  | 2 | # | 1 | 26.08919 |
| 2 | 4 | 0 | 11.52125 |  | 4 | 3 | 0 | 20.57504 |  | 2 | # | 1 | 26.08919 |
| 2 | 2 | 0 | 11.52125 |  | 7 | # | 0 | 20.57504 |  | 0 | 2 | 1 | 26.24956 |
| 4 | 2 | 0 | 11.52125 |  | 7 | # | 0 | 20.57504 |  | 0 | 2 | 1 | 26.24956 |
| 2 | 4 | 0 | 11.55069 |  | 2 | # | 0 | 21.08408 |  | 2 | # | 1 | 26.24956 |
| 2 | 2 | 0 | 11.55069 |  | 5 | # | 0 | 21.08408 |  | 2 | # | 1 | 26.24956 |
| 4 | 2 | 0 | 11.55069 |  | 2 | 5 | 0 | 21.08408 |  | 2 | 0 | 1 | 26.24956 |
| 1 | 4 | 0 | 12.00514 |  | 5 | 2 | 0 | 21.08408 |  | 2 | 0 | 1 | 26.24956 |
| 1 | 3 | 0 | 12.00514 |  | 7 | # | 0 | 21.08408 |  | 0 | 2 | 1 | 26.31668 |
| 3 | 4 | 0 | 12.00514 |  | 7 | # | 0 | 21.08409 |  | 0 | 2 | 1 | 26.31668 |
| 4 | 3 | 0 | 12.00514 |  | 2 | # | 0 | 21.1378  |  | 2 | # | 1 | 26.31668 |
| 3 | 1 | 0 | 12.00514 |  | 5 | # | 0 | 21.1378  |  | 2 | # | 1 | 26.31668 |

|   |   |   |          |  |   |   |   |          |  |   |   |   |          |
|---|---|---|----------|--|---|---|---|----------|--|---|---|---|----------|
| 4 | 1 | 0 | 12.00514 |  | 2 | 5 | 0 | 21.1378  |  | 2 | 0 | 1 | 26.31668 |
| 1 | 4 | 0 | 12.0358  |  | 5 | 2 | 0 | 21.1378  |  | 2 | 0 | 1 | 26.31668 |
| 1 | 3 | 0 | 12.0358  |  | 7 | # | 0 | 21.1378  |  | 4 | # | 0 | 26.52818 |
| 3 | 4 | 0 | 12.0358  |  | 7 | # | 0 | 21.1378  |  | 5 | # | 0 | 26.52818 |
| 4 | 3 | 0 | 12.0358  |  | 1 | # | 0 | 22.16656 |  | 4 | 5 | 0 | 26.52818 |
| 3 | 1 | 0 | 12.0358  |  | 1 | 6 | 0 | 22.16656 |  | 5 | 4 | 0 | 26.52818 |
| 4 | 1 | 0 | 12.0358  |  | 6 | # | 0 | 22.16656 |  | 9 | # | 0 | 26.52818 |
| 0 | 4 | 0 | 13.3557  |  | 7 | # | 0 | 22.16656 |  | 9 | # | 0 | 26.52818 |
| 4 | 4 | 0 | 13.3557  |  | 6 | 1 | 0 | 22.16656 |  | 4 | # | 0 | 26.59603 |
| 4 | 0 | 0 | 13.3557  |  | 7 | # | 0 | 22.16656 |  | 5 | # | 0 | 26.59603 |
| 0 | 4 | 0 | 13.38976 |  | 1 | # | 0 | 22.22306 |  | 4 | 5 | 0 | 26.59604 |
| 4 | 4 | 0 | 13.38976 |  | 1 | 6 | 0 | 22.22306 |  | 5 | 4 | 0 | 26.59604 |
| 4 | 0 | 0 | 13.38976 |  | 6 | # | 0 | 22.22306 |  | 9 | # | 0 | 26.59604 |
| 2 | 5 | 0 | 14.58617 |  | 7 | # | 0 | 22.22306 |  | 9 | # | 0 | 26.59604 |
| 3 | 5 | 0 | 14.58617 |  | 6 | 1 | 0 | 22.22306 |  | 1 | # | 1 | 26.91971 |
| 2 | 1 | 0 | 14.58617 |  | 7 | # | 0 | 22.22306 |  | 1 | # | 1 | 26.91971 |
| 3 | 2 | 0 | 14.58618 |  | 4 | # | 0 | 23.4537  |  | 2 | # | 1 | 26.91971 |
| 5 | 3 | 0 | 14.58618 |  | 4 | 4 | 0 | 23.4537  |  | 2 | # | 1 | 26.91971 |
| 5 | 2 | 0 | 14.58618 |  | 8 | # | 0 | 23.4537  |  | 1 | 2 | 1 | 26.91971 |
| 2 | 5 | 0 | 14.62333 |  | 4 | # | 0 | 23.51353 |  | 1 | 2 | 1 | 26.91971 |
| 3 | 5 | 0 | 14.62333 |  | 4 | 4 | 0 | 23.51354 |  | 2 | 1 | 1 | 26.91971 |
| 2 | 3 | 0 | 14.62333 |  | 8 | # | 0 | 23.51354 |  | 2 | 1 | 1 | 26.91971 |
| 3 | 2 | 0 | 14.62333 |  | 3 | # | 0 | 23.70329 |  | 3 | # | 1 | 26.91971 |
| 5 | 3 | 0 | 14.62334 |  | 0 | 7 | 0 | 23.70329 |  | 3 | # | 1 | 26.91971 |
| 5 | 2 | 0 | 14.62334 |  | 5 | # | 0 | 23.70329 |  | 3 | # | 1 | 26.91971 |
| 1 | 5 | 0 | 15.3539  |  | 3 | 5 | 0 | 23.70329 |  | 3 | # | 1 | 26.91971 |
| 1 | 4 | 0 | 15.3539  |  | 7 | # | 0 | 23.70329 |  | 3 | # | 0 | 26.97241 |
| 4 | 5 | 0 | 15.3539  |  | 5 | 3 | 0 | 23.70329 |  | 6 | # | 0 | 26.97241 |
| 5 | 4 | 0 | 15.3539  |  | 8 | # | 0 | 23.70329 |  | 3 | 6 | 0 | 26.97241 |
| 4 | 1 | 0 | 15.3539  |  | 7 | 0 | 0 | 23.70329 |  | 6 | 3 | 0 | 26.97241 |
| 5 | 1 | 0 | 15.3539  |  | 8 | # | 0 | 23.70329 |  | 9 | # | 0 | 26.97241 |
| 1 | 5 | 0 | 15.393   |  | 3 | # | 0 | 23.76377 |  | 9 | # | 0 | 26.97241 |
| 1 | 4 | 0 | 15.393   |  | 0 | 7 | 0 | 23.76377 |  | 1 | # | 1 | 26.9886  |
| 4 | 5 | 0 | 15.393   |  | 5 | # | 0 | 23.76377 |  | 1 | # | 1 | 26.9886  |
| 5 | 4 | 0 | 15.393   |  | 3 | 5 | 0 | 23.76377 |  | 2 | # | 1 | 26.9886  |
| 4 | 1 | 0 | 15.393   |  | 7 | # | 0 | 23.76377 |  | 2 | # | 1 | 26.9886  |
| 5 | 1 | 0 | 15.393   |  | 5 | 3 | 0 | 23.76377 |  | 1 | 2 | 1 | 26.9886  |
| 0 | 5 | 0 | 16.78851 |  | 8 | # | 0 | 23.76377 |  | 1 | 2 | 1 | 26.9886  |
| 5 | 5 | 0 | 16.78851 |  | 7 | 0 | 0 | 23.76377 |  | 2 | 1 | 1 | 26.9886  |
| 5 | 0 | 0 | 16.78851 |  | 8 | # | 0 | 23.76377 |  | 2 | 1 | 1 | 26.9886  |
| 0 | 5 | 0 | 16.83124 |  | 2 | # | 0 | 24.43781 |  | 3 | # | 1 | 26.9886  |

|   |   |   |          |  |   |   |   |          |  |   |   |   |          |
|---|---|---|----------|--|---|---|---|----------|--|---|---|---|----------|
| 5 | 5 | 0 | 16.83125 |  | 2 | 6 | 0 | 24.43782 |  | 3 | # | 1 | 26.9886  |
| 5 | 0 | 0 | 16.83125 |  | 6 | # | 0 | 24.43782 |  | 3 | # | 1 | 26.9886  |
| 3 | 6 | 0 | 17.46355 |  | 8 | # | 0 | 24.43782 |  | 3 | # | 1 | 26.9886  |
| 3 | 3 | 0 | 17.46355 |  | 6 | 2 | 0 | 24.43782 |  | 3 | # | 0 | 27.04143 |
| 6 | 3 | 0 | 17.46355 |  | 8 | # | 0 | 24.43782 |  | 6 | # | 0 | 27.04143 |
| 3 | 6 | 0 | 17.50801 |  | 2 | # | 0 | 24.50021 |  | 3 | 6 | 0 | 27.04143 |
| 3 | 3 | 0 | 17.50801 |  | 2 | 6 | 0 | 24.50021 |  | 6 | 3 | 0 | 27.04143 |
| 6 | 3 | 0 | 17.50801 |  | 6 | # | 0 | 24.50021 |  | 9 | # | 0 | 27.04143 |
| 2 | 6 | 0 | 17.79191 |  | 8 | # | 0 | 24.50021 |  | 9 | # | 0 | 27.04143 |
| 4 | 6 | 0 | 17.79191 |  | 6 | 2 | 0 | 24.50021 |  | 0 | 8 | 0 | 27.19203 |
| 2 | 4 | 0 | 17.79191 |  | 8 | # | 0 | 24.50021 |  | 8 | # | 0 | 27.19203 |
|   |   |   |          |  | 0 | 0 | 1 | 25.33075 |  | 8 | 0 | 0 | 27.19204 |
